# Supplementary material for: Sirtuin 2 knockdown inhibits cell proliferation and RAS/ERK signaling, and promotes cell apoptosis and cell cycle arrest in multiple myeloma
Source: PubMed Central journal article supplement — Mol Med Rep. 2021 Sep 2;24(5):760. doi: 10.3892/mmr.2021.12400 (PMC8436222; doi:10.3892/mmr.2021.12400), 2021-09-02

Figure S1. Detection of SIRT2 expression in patients with MM and HCs. Comparison of SIRT2 mRNA expression levels between patients with MM and HCs. SIRT2, sirtuin 2; MM, multiple myeloma; HCs, healthy controls.

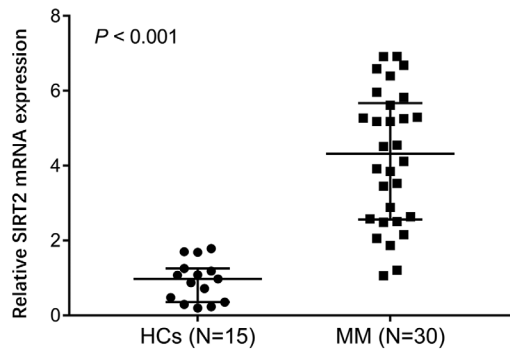

Figure S2. Effects of SIRT2 knockdown on PI3K expression. Comparison of PI3K and p-PI3K protein expression between the Sh-NC and Sh-SIRT2 groups in (A and B) NCI-H929 and (C and D) RPMI-8226 cells. SIRT2, sirtuin 2; Sh-SIRT2, shRNA-SIRT2; Sh-NC, shRNA-negative control; shRNA, short hairpin RNA; p-PI3K, phosphorylated-PI3K. \* $P < 0.05$ , \*\* $P < 0.01$ .

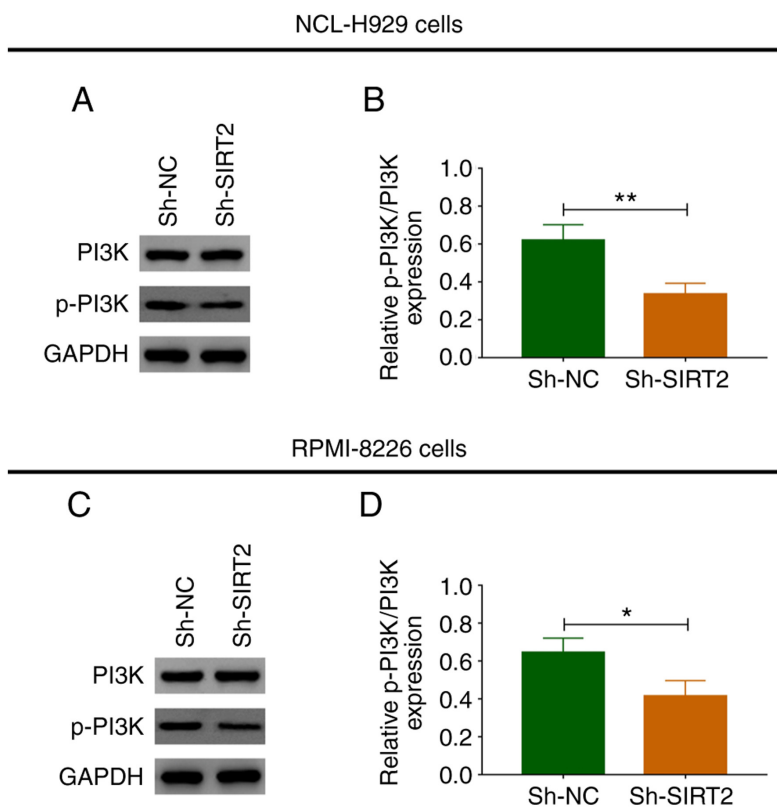

Supplement: Supplementary_Data.pdf [file Supplementary_Data.pdf]
